# Supplementary material for: MiR-494-3p promotes PI3K/AKT pathway hyperactivation and human hepatocellular carcinoma progression by targeting PTEN
Source: PubMed Central journal article supplement (PMC6041272; doi:10.1038/s41598-018-28519-2), 2018-07-11
Supplement: 41598_2018_28519_MOESM1_ESM.pdf [file 41598_2018_28519_MOESM1_ESM.pdf]

**MiR-494-3p promotes PI3K/AKT pathway hyperactivation and human hepatocellular carcinoma progression by targeting PTEN**

Hui Lin<sup>1#</sup>, Zhi-Ping Huang<sup>4#</sup>, Jiao Liu<sup>5#</sup>, Yun Qiu<sup>2#</sup>, Yuan-ping Tao<sup>4</sup>, Meng-chao Wang<sup>4</sup>, Hui Yao<sup>2</sup>, Ke-zhu Hou<sup>1\*</sup>, Fang-ming Gu<sup>4\*</sup>, Xuan-fu Xu<sup>3\*</sup>

**Supplementary Table 1. Univariable analysis for RFS and OS**

| Variable                                        | RFS   |       |             | OS    |       |             |
|-------------------------------------------------|-------|-------|-------------|-------|-------|-------------|
|                                                 | P     | HR    | 95% CI      | P     | HR    | 95% CI      |
| <b>Age, years,</b><br>≥55 vs. <55               | 0.700 | 1.060 | 0.787 1.428 | 0.236 | 1.233 | 0.872 1.745 |
| <b>Sex,</b><br>male vs. female                  | 0.178 | 1.378 | 0.864 2.197 | 0.471 | 1.212 | 0.718 2.045 |
| <b>AFP, µg/L,</b><br>≥20 vs <20                 | 0.382 | 1.140 | 0.850 1.528 | 0.031 | 1.451 | 1.035 2.034 |
| <b>Cirrhosis</b><br>absent vs. present          | 0.219 | 0.835 | 0.626 1.113 | 0.573 | 0.907 | 0.646 1.273 |
| <b>Tumor diameter, cm,</b><br>≥5 vs. <5         | 0.001 | 1.725 | 1.237 2.406 | 0.048 | 1.477 | 1.003 2.177 |
| <b>Tumor number,</b><br>multiple vs. solitary   | 0.047 | 1.501 | 1.005 2.240 | 0.047 | 1.566 | 1.006 2.439 |
| <b>Capsule,</b><br>absent vs. present           | 0.752 | 0.953 | 0.706 1.286 | 0.588 | 0.908 | 0.641 1.286 |
| <b>Vascular invasion,</b><br>present vs. absent | 0.000 | 1.967 | 1.439 2.689 | 0.000 | 2.458 | 1.722 3.507 |
| <b>TNM stage,</b><br>III and IV vs. I and II    | 0.081 | 1.407 | 0.958 2.067 | 0.003 | 1.886 | 1.235 2.879 |
| <b>BCLC stage,</b><br>C and D vs. A and B       | 0.081 | 1.454 | 0.955 2.213 | 0.034 | 1.651 | 1.040 2.623 |
| <b>miR-494-3p expression,</b><br>high vs. low   | 0.027 | 1.366 | 1.037 1.801 | 0.001 | 1.757 | 1.272 2.428 |

**Abbreviation:** AFP, alpha fetoprotein; BCLC stage, Barcelona Clinic Liver Cancer stage.

**Supplementary Table 2 RT-qPCR primers:**

| <b>Gene</b> | <b>Forward</b>         | <b>Reverse</b>         |
|-------------|------------------------|------------------------|
| U6          | CTCGCTTCGGCAGCACA      | AACGCTTCACGAATTTGCGT   |
| PTEN        | TGGATTCGACTTAGACTTGACC | AGGATATTGTGCAACTCTGCAA |
| ACTIN       | CACTCTTCCAGCCTTCCTT    | CTCGTCATACTCCTGCTTGCT  |

# Supplementary figure 1

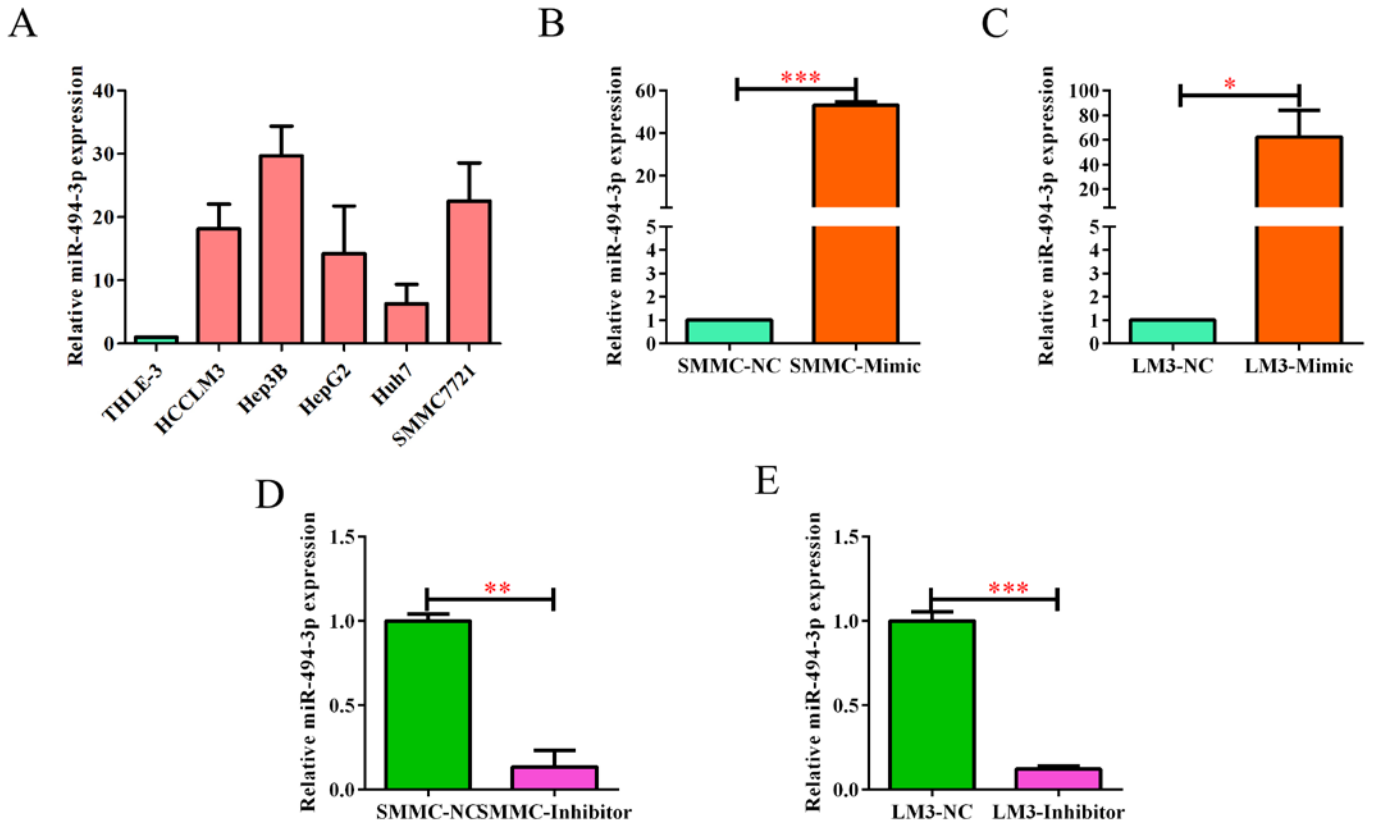

## Supplementary figure 2

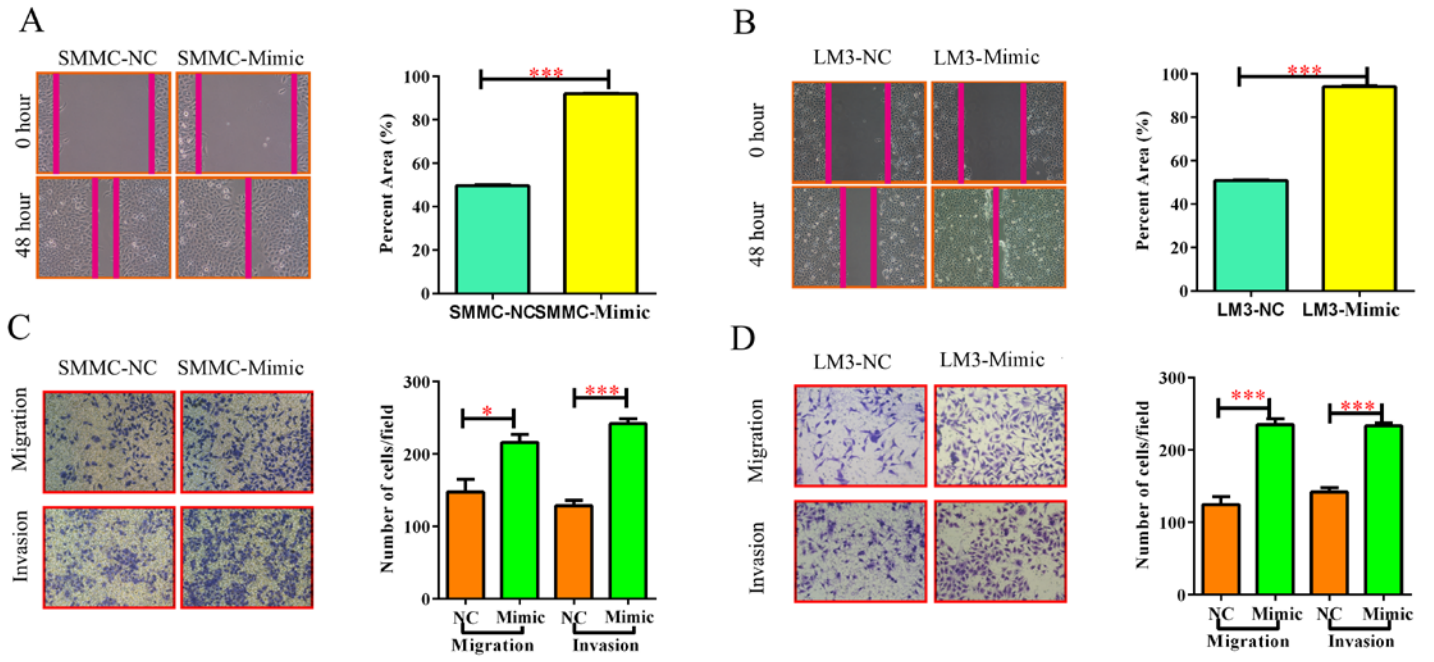

# Supplementary figure 3

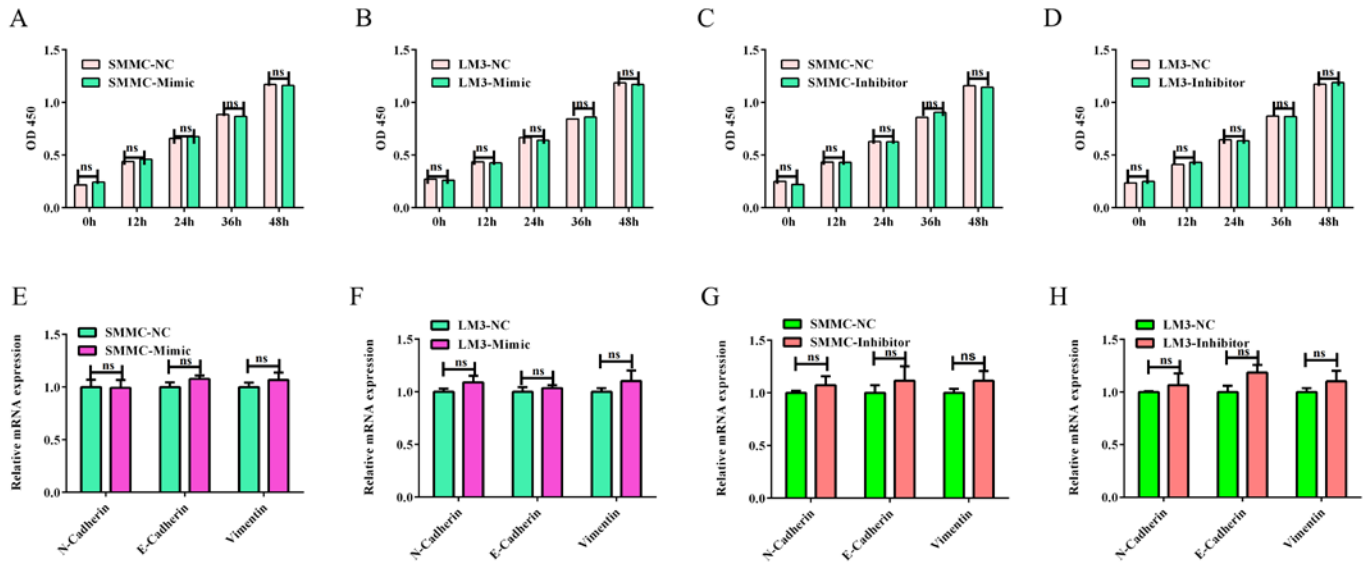

Supplementary figure 4

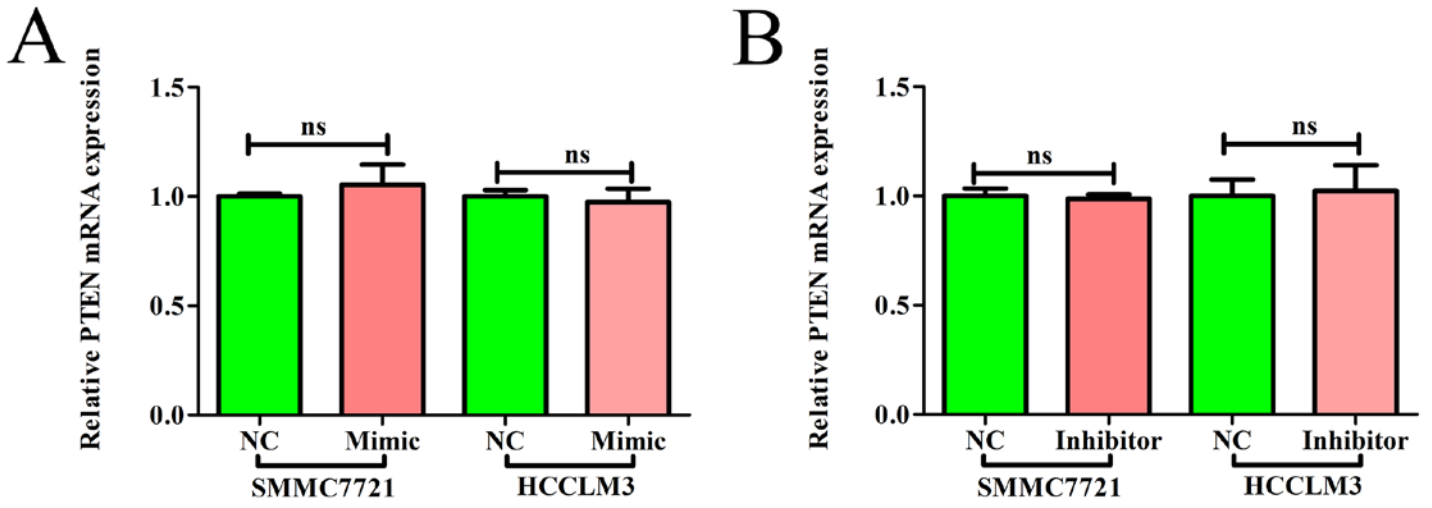

Supplementary figure 5

A

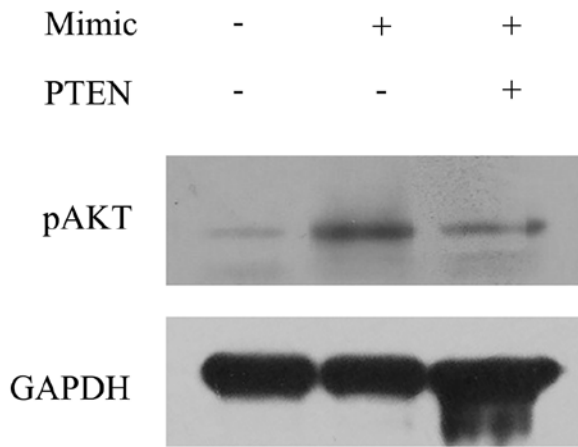

B

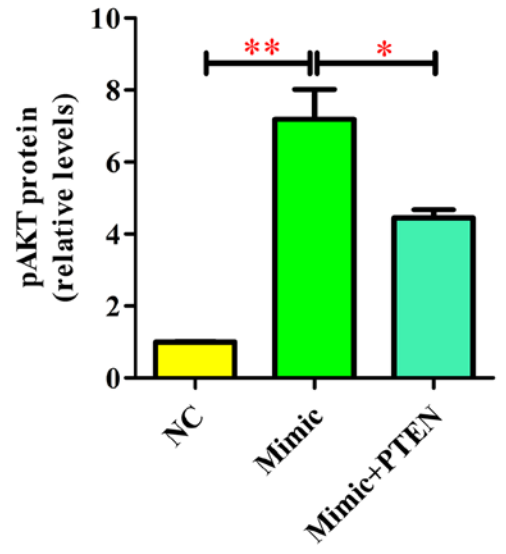

## Supplementary legends

### Supplement Figure1

(A) miR-494-3p expression levels in various human HCC cell lines and human hepatocyte THLE-3 cells. (B) miR-494-3p expression levels were significantly increased in SMMC-mimic cells compared with those in SMMC-NC cells. (C) miR-494-3p expression levels were significantly inhibited in SMMC-inhibitor cells compared with those in SMMC -NC cells. (D) miR-494-3p expression levels were significantly increased in LM3-mimic cells compared with those in LM3-NC cells. (E) miR-494-3p expression levels were significantly inhibited in LM3-inhibitor cells compared with those in LM3-NC cells. (\* $p < 0.05$ , \*\* $p < 0.01$ , \*\*\* $p < 0.001$ )

### Supplement Figure2

(A-B) Wound-healing (C-D) Transwell migration and Matrigel invasion assays in each HCC cells. Cells were counted in 3 randomized fields at a magnification of 100 $\times$ . The error bar represents the mean $\pm$ SD of triplicate assays (\* $p < 0.05$ , \*\*  $p < 0.01$ , and \*\*\*  $p < 0.001$ ).

### Supplement Figure3

(A-D) The growth curves of the SMMC-Mimic, LM3-Mimic, SMMC-Inhibitor, LM3-Inhibitor and their controls, respectively, in CCK8 assay. (E-H) Caspase-3, Caspase-7, and Caspase-9 mRNA levels were compared by RT-PCR, (\* $p < 0.05$ , \*\* $p < 0.01$ , \*\*\* $p < 0.001$ )

### Supplement Figure4

(A) PTEN mRNA expression in response to miR-494-3p Inhibitor was determined by qRT-PCR in SMMC7721 and HCCLM3. (B) PTEN mRNA expression in response to miR-494-3p inhibitor was determined by qRT-PCR in SMMC7721 and HCCLM3 , (\* $p < 0.05$ , \*\* $p < 0.01$ , \*\*\* $p < 0.001$ )

### Supplement Figure5

(A) Western blot of pAKT expression (representative of three experiments) 48 h after transfection with GFP-PTEN or empty vector. (B) Densitometric quantification. GAPDH was used as a loading control in. Values represent mean  $\pm$  SD (n = 3). \* $p < 0.05$ ; \*\* $p < 0.01$ ; \*\*\* $p < 0.001$
